# Supplementary material
Source: publisher site journal article supplement (https://www.dovepress.com/article/357267)
Supplement: Supplementary file 1 [file get_supplementary_file.php]

**Supplemental Table 1.** Surgical procedures and medications in addition to intraocular dexamethasone initiated at any point in the study.

|  | **All Patients**  **(N=527, 641 Study Eyes)** |
| --- | --- |
| **Surgery Type** | |
| Phacoemulsification and IOL implantation plus Femto (no MIGS) | 565 (88.1%) |
| Phacoemulsification and IOL implantation (no Femto, no MIGS) | 58 (9.0%) |
| Phacoemulsification and IOL implantation plus MIGS (no Femto) | 14 (2.2%) |
| Phacoemulsification and IOL implantation plus MIGS and Femto | 4 (0.6%) |
| **Concomitant Medication**[a] | |
| No concomitant ocular anti-inflammatory medication | 150 (23.4%) |
| Topical Ophthalmic NSAID | 460 (71.8%) |
| Topical Ophthalmic Steroid[b] | 213 (33.2%) |
| Intracameral phenylephrine/ketorolac (Omidria) | 149 (23.2%) |
| Intracameral moxifloxacin or cefuroxime | 88 (13.7%) |
| Compounded antibiotic, steroid, and NSAID | 29 (4.5%) |
| Compounded steroid and NSAID | 29 (4.5%) |

Femto, femtosecond laser-assisted; IOL, intraocular lens; MIGS, minimally invasive glaucoma surgery; NSAID, nonsteroidal anti-inflammatory drug

[a] For each treatment category, patients reporting more than one treatment (brand/generic name) are counted only once. Percentages were calculated by dividing the results in a given category by the number of eyes with surgery.

[b] Topical ophthalmic steroids include dexamethasone, difluprednate, fluorometholone, loteprednol etabonate, prednisolone, and rimexolone.
